# Supplementary material
Source: Research Square preprint supplement (doi:10.21203/rs.3.rs-10215707/v1)
Supplement: Supplementary file 1 [file 9f0d838153326ba14a8b4a76.docx]

**Supplementary information**

**Novel Paper-Based Electrochemical System for Detection of Anti-Spike Protein Antibodies from SARS-CoV-2**

Rita M. Martins1,2,3, Adélio M. Mendes2,3, Caglar Elbuken4,5, M. Goreti F. Sales1

*1 BioMark/CEMMPRE-ARISE, Department of Chemical Engineering, Faculty of Sciences and Technology, University of Coimbra, Rua Sílvio Lima-Polo II, Coimbra, 3030-790, Portugal*

*2 LEPABE - Laboratory for Process, Environment, Biotechnology and Energy Engineering,*

*3 ALiCE - Associate Laboratory in Chemical Engineering, Faculty of Engineering, University of Porto, Rua Dr Roberto Frias, 4200-465 Porto, Portugal*

*4 Faculty of Biochemistry and Molecular Medicine, University of Oulu, Oulu, Finland*

*5 VTT Technical Research Centre of Finland, Oulu, Finland*

Corresponding author:

Rita Maria Martins

rita.a.martins@uc.pt

**This document provides additional experimental data to support the findings discussed in the manuscript**

Figure S1 – Calibration curve with the absolute current peak values for the calculation of the limit of detection (LOD) through the IUPAC recommendations for ion-selective electrodes.

Figure S2 – Indirect Elisa assay results to check the presence of anti-ST antibodies on the real nasopharyngeal (NP) samples.

Figure S3 – Elisa assay results upon the functionalization of the liposomes with the ST protein, to verify its recognition capacity for the specific Anti-ST antibody, and the efficient liposome functionalization with the ST protein.
